# Supplementary material
Source: PubMed Central journal article supplement (PMC37526)
Supplement: pnas_141244998_1.pdf [file pnas_141244998_1.pdf]

**Table 1. Genes highly expressed in prenatal hippocampus (cluster 1)**

| Accession no.                         |                                                            | Fold change:<br>(E16 vs. P30) |
|---------------------------------------|------------------------------------------------------------|-------------------------------|
| <b>Mitosis/cell cycle progression</b> |                                                            |                               |
| aa289122_s_at                         | Cyclin-dependent kinase regulatory subunit 2               | 17.21                         |
| X66032_s_at                           | Cyclin B2                                                  | 11.78                         |
| af005885_s_at                         | Cyclin G2                                                  | 2.71                          |
| Msa.25099.0_s_at (sp Q04827)          | G1/S-specific cyclin D2                                    | 2.98                          |
| L01640_s_at                           | D-type G1 cyclin catalytic subunit (PSK-J3/CDK4)           | 8.59                          |
| Msa.29759.0_f_at (sp P30285)          | Cell division protein kinase 4 (PSK-J3)                    | 1.51                          |
| M83749_s_at                           | D-type cyclin (CYL2)                                       | 6.76                          |
| Msa.7498.0_s_at                       | GADD45 (Growth arrest and DNA damage-induced protein)      | 2.07                          |
| AF011644_at                           | Oral tumor suppressor homolog (Doc-1)                      | 11.13                         |
| K01700-2_s_at                         | p53 cellular tumor antigen                                 | 21.12                         |
| <b>DNA and RNA synthesis</b>          |                                                            |                               |
| d12513_f_at                           | DNA topoisomerase II                                       | 21.89                         |
| X53068_s_at                           | Proliferating cell nuclear antigen                         | 2.11                          |
| D31966_s_at                           | RNA polymerase I, 40-kD subunit                            | 4.09                          |
| L25125                                | RNA helicase and RNA-dependent ATPase from DEAD box family | 5.11                          |
| X63019_s_at                           | U2-snRNPb (pRNP11)                                         | 4.69                          |
| Msa.3346.0_s_at (sp P40070)           | U6-snRNA-associated protein                                | 1.87                          |
| Msa.18074.0_f_at                      | Unwinding protein 1                                        | 8.99                          |
| Msa.18312.0_s_at                      | pre-mRNA splicing factor SRP75                             | 2.87                          |
| aa690583_at (gb: X70944)              | Myoblast cell surface antigen 24.1D5                       | 3.91                          |
| aa269806_s_at (gb: Z35401)            | Histone H2A.X                                              | 4.37                          |
| M37736_f_at                           | Replication-dependent histone H2A.1                        | 13.03                         |
| X13171_s_at                           | H1 histone subtype H1 (0)                                  | 1.88                          |
| aa285607_s_at (gb: M37583)            | Histone H2A.Z                                              | 8.85                          |
| <b>Transcriptional regulation</b>     |                                                            |                               |
| x17459_s_at                           | J kappa RS-binding protein                                 | 5.76                          |
| aa030563_f_at (gb: M90356)            | Transcription factor BTF3                                  | 7.49                          |
| Msa.2969.0_s_at                       | Neurogenin-2 (ngn2)                                        | 8.44                          |
| AF004294_at                           | Myelin transcription factor 1                              | 4.58                          |
| X55316_s_at                           | CAAT-box DNA binding protein subunit B (NF-YB)             | 3.07                          |
| U40825_s_at                           | WW-domain binding protein-1                                | 2.86                          |
| <b>Translational regulation</b>       |                                                            |                               |
| C78483_RC_f_at                        | Elongation factor-1-alpha                                  | 2.79                          |
| aa145945_f_at (gb: X63526)            | Elongation factor-1-gamma                                  | 3.92                          |
| Msa.15983.0_f_at (sp P29691)          | Elongation factor-2 (EF-2)                                 | 3.01                          |
| Msa.9866.0_s_at                       | Initiation Factor 2 associated 67-kD glycoprotein          | 3.26                          |
| Msa.4559.0_s_at (sp P41035)           | Translational initiation factor 2 beta subunit (EIF-2)     | 3.02                          |

| Accession no.                  |                                 | Fold change:<br>(E16 vs. P30) |
|--------------------------------|---------------------------------|-------------------------------|
| Mitosis/cell cycle progression |                                 |                               |
| aa268341_s_at (TR: E223201)    | Ubiquitin-conjugating enzyme E2 | 23.42                         |
| U28917_f_at                    | 60S ribosomal protein A52       | 3.44                          |
| AA589525_RC_f_at               | Ribosomal protein L5            | 3.31                          |
| U67771_f_at                    | Ribosomal protein L8 (RPL8)     | 4.39                          |
| aa050526_f_at                  | 60S ribosomal protein L9        | 2.57                          |
| L04280                         | Ribosomal protein L12 (RPL12)   | 6.24                          |
| Msa.3380.0_f_at (sp P19253)    | 60S ribosomal protein L13A      | 2.27                          |
| Mitosis/cell cycle progression |                                 |                               |
| L04128                         | Ribosomal protein L18 (RPL18)   | 4.97                          |
| M62952_f_at                    | Ribosomal protein L19           | 2.21                          |
| K02928_f_at                    | Ribosomal protein L30           | 2.53                          |
| aa538407_s_at (SW: RL2B)       | 60S ribosomal protein L23       | 3.59                          |
| aa614984_f_at (gb:K02060)      | 60S ribosomal protein L32       | 3.82                          |
| AA541910_s_at                  | 60S ribosomal protein L34       | 3.27                          |
| aa015377_f_at                  | 60S ribosomal protein L37       | 2.33                          |
| C78229_RC_f_at                 | Ribosomal protein S8            | 2.93                          |
| aa036204_s_at (gb: M31520)     | 40S ribosomal protein S24       | 2.71                          |
| M76763_f_at                    | Ribosomal protein Ke-3          | 4.41                          |
