# Supplementary material
Source: PubMed Central journal article supplement (PMC37526)
Supplement: pnas_141244998_2.pdf [file pnas_141244998_2.pdf]

Supplementary material for Mody *et al.* (July 3, 2001) *Proc. Natl. Acad. Sci. USA*,  
10.1073/pnas.141244998

**Table 2. Genes highly expressed in the neonatal hippocampus (clusters 4 and 8)**

| Accession no.                                 |                                                          | Fold change:<br>(P1 vs. P30) |
|-----------------------------------------------|----------------------------------------------------------|------------------------------|
| <b>Cytoskeletal formation</b>                 |                                                          |                              |
| Msa.28725.0                                   | Actin, cytoplasmic 1 (beta actin)                        | 1.55                         |
| Msa.12411.0_f_at (sp P10982)                  | Actin-1                                                  | 1.79                         |
| Msa.29217.0_f_at (sp Q03342)                  | Actin-3                                                  | 1.71                         |
| Msa401.0_f_at                                 | Cytoskeletal gamma actin                                 | 2.09                         |
| M13442_f_at                                   | Tubulin M-alpha-3                                        | 2.28                         |
| Msa.10829.0_f_at (sp P33631)                  | Tubulin beta-1 chain                                     | 3.59                         |
| Msa.11249.0_f_at (sp P33631)                  | Tubulin beta-2 chain                                     | 4.65                         |
| m13445_f_at                                   | Tubulin alpha-1                                          | 2.53                         |
| Msa.33563.0_f_at (sp P05215)                  | Tubulin alpha-4                                          | 3.29                         |
| Msa.14020.0_f_at (sp P09644)                  | Tubulin alpha-5                                          | 2.85                         |
| Msa.10568.0_f_at (sp P05216)                  | Tubulin alpha-6                                          | 4.73                         |
| Msa.220430_f_at (sp P09645)                   | Tubulin alpha-8                                          | 2.65                         |
| Msa.26238.0_s_at (sp P08841)                  | Tubulin beta-3                                           | 8.73                         |
| Msa.12584.0_f_at (sp P09652)                  | Tubulin beta-4 (class III)                               | 10.95                        |
| Msa.1257.0_f_at                               | Tubulin M-alpha-2                                        | 1.74                         |
| Msa.1258.0_f_at                               | Tubulin M-alpha-3                                        | 3.58                         |
| X04663_f_at                                   | Tubulin M-beta-5                                         | 4.82                         |
| <b>Chaperone functions</b>                    |                                                          |                              |
| Z31399_s_at                                   | CCT eta subunit (chaperonin containing TCP-1)            | 1.48                         |
| Z31555_s_at                                   | CCTepsilon subunit (chaperonin containing TCP-1)         | 1.58                         |
| Msa.5340_f_at                                 | CCT delta subunit (chaperonin containing TCP-1)          | 1.83                         |
| Z37164_s_at                                   | CCT theta subunit (cystolic chaperonin containing TCP-1) | 2.13                         |
| Msa.7596.0_f_at (sp P4 8428)                  | TCP1-chaperonin cofactor A                               | 2.74                         |
| <b>Protein turnover</b>                       |                                                          |                              |
| Msa.15493.0_f_At (sp P26640)                  | Valyl-tRNA synthetase                                    | 4.25                         |
| Msa.85920.0_s_at                              | Threonyl-tRNA synthetase                                 | 2.73                         |
| Msa.2082.0_s_at                               | Ubiquitin-conjugating enzyme (UbcM2)                     | 3.01                         |
| Msa.6620.0_s_at                               | Ubiquitin carboxyl-terminal hydrolase                    | 4.39                         |
| Msa.21622.0_f_at                              | Ubiquitin-activating enzyme E1-X                         | 2.24                         |
| u54803                                        | Cysteine protease                                        | 26.61                        |
| <b>Cell adhesion and extracellular matrix</b> |                                                          |                              |
| J04694_s_at                                   | Collagen alpha-1, type IV (col4a-1)                      | 2.71                         |
| M18194_f_at                                   | Fibronectin (FN)                                         | 4.28                         |
| X56304_s_at                                   | Tenascin                                                 | 45.47                        |
| U20365_f_at                                   | Gamma-actin                                              | 1.68                         |
| X94310_s_at                                   | L1-like protein                                          | 2.31                         |
| Y00051_at                                     | Neural cell adhesion molecule (NCAM)                     | 2.79                         |

| Accession no.                     |                                              | Fold change:<br>(P1 vs. P30) |
|-----------------------------------|----------------------------------------------|------------------------------|
| Cytoskeletal formation            |                                              |                              |
| Msa.2554.0_at                     | Neural cell adhesion molecule L1 (NCAM-L1)   | 3.47                         |
| D50086_s_at                       | Neurophilin                                  | 2.11                         |
| m31131_s_at                       | Neural cadherin (N-cadherin)                 | 2.12                         |
| u54984_s_at                       | Membrane-type matrix metalloproteinase 1     | 3.01                         |
| Fatty acid and membrane synthesis |                                              |                              |
| U04827_s_at                       | Brain fatty acid-binding protein (B-FABP)    | 8.65                         |
| X13135_s_at                       | Fatty acid synthase                          | 2.93                         |
| aa683731_s_at (gb: M15856)        | Lipoprotein lipase precursor                 | 2.26                         |
| D42048_s_at                       | Squalene epoxidase                           | 3.55                         |
| Msa.4964.0_f_at                   | Farnesyl pyrophosphate synthetase            | 2.52                         |
| X70100_f_at                       | Keratinocyte lipid-binding protein           | 4.16                         |
| U13262_s_at                       | Myelin gene expression factor (MEF-2)        | 2.56                         |
| x83562_s_at                       | <i>N</i> -glycan alpha 2,8-sialyltransferase | 48.94                        |
