# Supplementary material
Source: PubMed Central journal article supplement (PMC37526)
Supplement: pnas_141244998_3.pdf [file pnas_141244998_3.pdf]

Supplementary material for Mody *et al.* (July 3, 2001) *Proc. Natl. Acad. Sci. USA*,  
10.1073/pnas.141244998

**Table 3. Genes up-regulated in late postnatal stages (clusters 11 and 15)**

| Accession no.                                    |                                                                 | Fold change:<br>(P30 vs. E16) |
|--------------------------------------------------|-----------------------------------------------------------------|-------------------------------|
| <b>Synaptic function</b>                         |                                                                 |                               |
| Msa.4409.0_at                                    | Clathrin, light chain B                                         | 3.07                          |
| D37792                                           | Synaptogamin I/65                                               | 9.45                          |
| D45903_s_at                                      | UNC-18 homologue                                                | 3.14                          |
| Msa.2798.0_s_at                                  | Vesicle-associated membrane protein (VAMP2)                     | 4.92                          |
| Msa.11883.0_f_at (sp P07825)                     | Synaptophysin (major synaptic vesicle protein P38)              | 4.01                          |
| U62021_s_at                                      | Neuronal pentraxin 1                                            | 10.09                         |
| aa018019_s_at                                    | <i>N</i> -methyl-D-aspartate receptor - glutamate binding chain | 4.78                          |
| Msa.7923.0_s_at                                  | Neurogranin (protein kinase C substrate 7.5 kD)                 | 54.82                         |
| w13304_s_at                                      | Alpha-SNAP protein                                              | 3.02                          |
| U09383_s_at                                      | Calcium-activated potassium channel                             | 6.34                          |
| X97281                                           | Potassium channel, beta subunit                                 | 4.89                          |
| U51908_s_at                                      | Brain neurotensin receptor                                      | 25.25                         |
| U85489_s_at                                      | Acetylcholine receptor-interacting protein (AIP)                | 1.42                          |
| U92565_at                                        | Fractalkine                                                     | 133.65                        |
| X59520_f_at                                      | Cholecystokinin                                                 | 208.49                        |
| X55573_s_at                                      | Brain derived neurotrophic factor (BDNF)                        | 16.48                         |
| X57497_s_at                                      | Glutamate receptor 1 (GluR1)                                    | 17.97                         |
| X57498_at                                        | Glutamate receptor 2 (GluR2)                                    | 2.88                          |
| <b>Signal transduction</b>                       |                                                                 |                               |
| U58886_s_at                                      | SH3-containing protein (SH3P4)                                  | 2.29                          |
| Msa.2863.0_s_at                                  | SH3P9                                                           | 3.02                          |
| Z50013_s_at                                      | C-H-Ras                                                         | 2.45                          |
| Msa.35485.0_f_at (sp P05713)                     | Ras-related protein RAB-3A                                      | 3.33                          |
| Msa.2276.0_s_at                                  | Mitogen activated protein kinase (erk-1)                        | 1.04                          |
| u05683_s_at                                      | Receptor-type tyrosine kinase                                   | 10.57                         |
| Msa.38455                                        | Focal adhesion kinase                                           | 37.32                         |
| j05479_s_at                                      | Calcineurin                                                     | 4.95                          |
| ET63003                                          | Phospholipase C beta 1                                          | 2.37                          |
| Msa.18213.0_s_at                                 | Diglyceride kinase                                              | 27.83                         |
| X99963_s_at                                      | RhoB                                                            | 4.98                          |
| X53532                                           | Protein kinase C                                                | 97.05                         |
| <b>Transcriptional and translational control</b> |                                                                 |                               |
| I20899_f_at                                      | Cell division cycle homolog (CDC25)                             | 16.92                         |
| L26479_s_at                                      | Elongation factor-1(alpha-CMS1)                                 | 13.45                         |
| M22326-2_s_at                                    | Growth factor-induced protein (zif/268)                         | 11.62                         |
| Msa.1186.0_s_at                                  | DNA-binding protein (Smbp-2)                                    | 4.75                          |
| Msa.17760.0_s_at                                 | Proto-oncogene DBL                                              | 3.57                          |
| Msa.18739.0 (sp P46933)                          | Transcriptional activator FE6J                                  | 2.62                          |

| Accession no.                                     |                                                                 | Fold change:<br>(P30 vs. E16) |
|---------------------------------------------------|-----------------------------------------------------------------|-------------------------------|
| <b>Synaptic function</b>                          |                                                                 |                               |
| Msa.24864.0_s_at (sp P07834)                      | Cell division control protein 4                                 | 15.38                         |
| U66141_s_at                                       | Transcription factor Sox-M                                      | 23.85                         |
| <b>Glucose metabolism</b>                         |                                                                 |                               |
| J03928_s_At                                       | Phosphofructokinase (PFK)                                       | 3.06                          |
| Msa.2087.0_f_at                                   | Pyruvate kinase                                                 | 1.64                          |
| Msa.18475.0_f_at                                  | Glucose-6-phosphate isomerase                                   | 6.35                          |
| AA717247_f_at (gb: Y00516)                        | Fructose biphosphate aldolase A                                 | 6.58                          |
| Msa.1619.0_f_at                                   | Triose phosphate isomerase                                      | 2.33                          |
| Msa.10491.0_s_at                                  | Gamma enolase (2-phospho-D-glycerate hydrolyase)                | 19.53                         |
| Msa.12494.0_f_at                                  | Alpha enolase (2-phospho-D-glycerate-hydrolyase)                | 5.11                          |
| aa033394_at (SW: P00489)                          | Glycogen phosphorylase                                          | 6.75                          |
| u48403                                            | Glycerol kinase                                                 | 1.55                          |
| <b>Oxidative metabolism</b>                       |                                                                 |                               |
| aa415929_s_at                                     | NADH-ubiquinone oxidoreductase chain 49 KD subunit              | 1.41                          |
| aa239003_s_at                                     | NADH-ubiquinone oxidoreductase AGGG subunit precursor           | 2                             |
| U37721_s_at                                       | Cytochrome <i>c</i> oxidase subunit VIII precursor (Cox81)      | 2.26                          |
| W53390_f_at                                       | Succinate Dehydrogenase                                         | 1.55                          |
| M29462_f_at                                       | Malate dehydrogenase                                            | 2.63                          |
| X51905_f_at                                       | Lactate dehydrogenase B                                         | 1.82                          |
| Msa.717.0_s_at                                    | Glycerophosphate dehydrogenase                                  | 124.51                        |
| af004670_s_at                                     | Antioxidant protein 2 (AOP2)                                    | 2.5                           |
| <b>Membrane regulation of ionic concentration</b> |                                                                 |                               |
| x83933_s_at                                       | Ryanodine receptor type 2                                       | 32.61                         |
| Msa.1868.0_s_at                                   | Vacuolar Adenosine Triphosphatase, subunit B                    | 2.16                          |
| Msa1869.0_f_at                                    | Vacuolar Adenosine Triphosphatase, subunit E                    | 2.29                          |
| U30840_s_at                                       | Voltage-dependent anion channel 1                               | 1.35                          |
| Msa.10561.0_s_at                                  | Sodium/potassium transporting ATPase beta-1 chain               | 7.95                          |
| Msa.11196.0_at                                    | Sodium/potassium transporting ATPase alpha-2 chain              | 3.45                          |
| Msa.18713.0_g_at                                  | Calcium-transporting ATPase sarcoplasmic reticulum type         | 2.46                          |
| Msa.23090.0_s_at                                  | Vacuolar ATP synthase subunit C                                 | 2.91                          |
| Msa.28655.0_s_at                                  | Vacuolar ATP synthase subunit AC45                              | 5.96                          |
| Msa.29770.0_f_at                                  | Vacuolar ATP synthase 16 KD proteolipid subunit                 | 4.23                          |
| Msa.8313.0_s_at                                   | Calcium-transporting ATPase endoplasmic reticulum type, class 2 | 7.79                          |
